# Supplementary material for: Time-series hyperpolarized xenon-129 MRI of lobar lung ventilation of COPD in comparison to V/Q-SPECT/CT and CT
Source: PubMed Central journal article supplement (PMC6610266; doi:10.1007/s00330-018-5888-y), 2018-12-14
Supplement: 330_2018_5888_MOESM1_ESM.pdf [file 330_2018_5888_MOESM1_ESM.pdf]

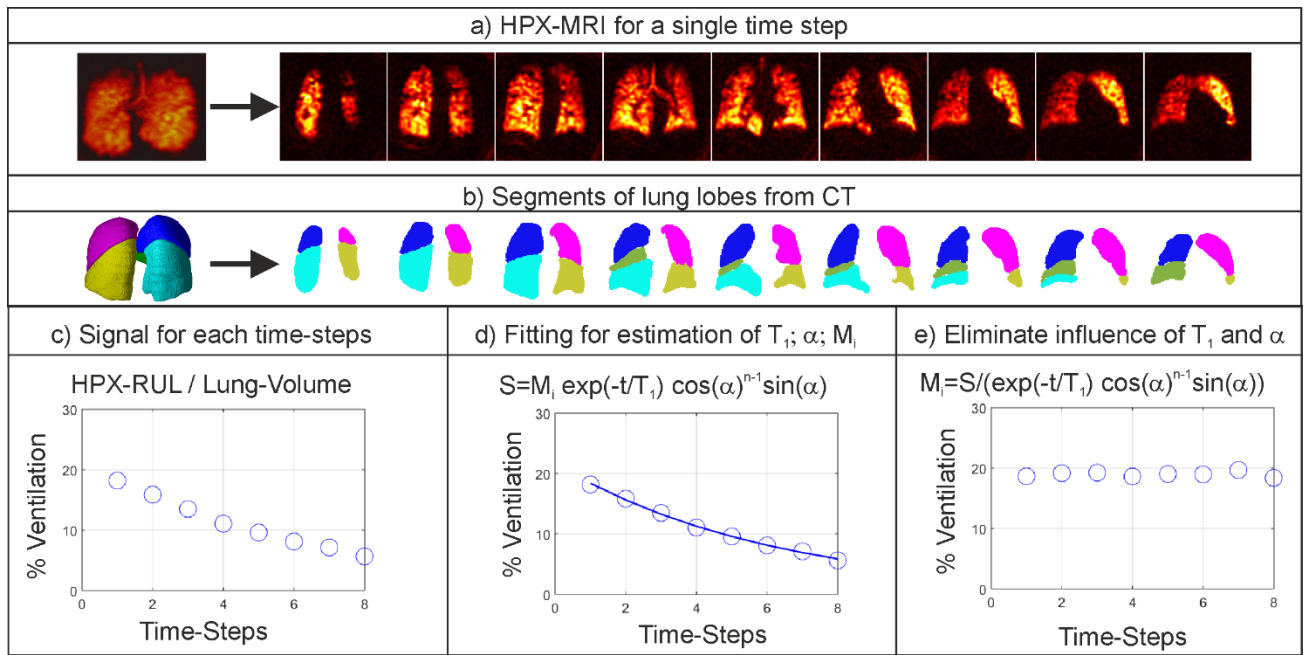

**Supplementary Figure 1:** Diagram of data analysis for the time-series HPX-MRI. The segments of lung lobes from the high resolution CT in (a) are applied to HPX-MRI images in (b). Signal for each time-step in (c) are fitted to the HPX signal decay equations in (d). Knowing  $T_1$ : Longitudinal magnetization decay time constant and;  $\alpha$ : Flip angle, the signal is corrected in (e).
